# Supplementary material
Source: PubMed Central journal article supplement (PMC3970484)
Supplement: 1322145111_pnas.201322145SI.pdf [file 1322145111_pnas.201322145SI.pdf]

# Supporting Information

Zalli et al. 10.1073/pnas.1322145111

**Table S1. Baseline values of physiological variables of men and women with the three telomere phenotypes**

| Physiological/psychosocial variable | Long telomeres | Short TL/low TA | Short TL/high TA | <i>P</i> , trend |
|-------------------------------------|----------------|-----------------|------------------|------------------|
| Systolic BP, mmHg                   |                |                 |                  |                  |
| Men                                 | 128.4 ± 13.5   | 127.9 ± 13.5    | 125.9 ± 13.6     | 0.64             |
| Women                               | 124.7 ± 15.5   | 127.7 ± 16.0    | 125.3 ± 14.9     | 0.64             |
| Diastolic BP, mmHg                  |                |                 |                  |                  |
| Men                                 | 75.1 ± 8.6     | 74.8 ± 8.6      | 74.3 ± 9.2       | 0.89             |
| Women                               | 71.5 ± 9.2     | 71.7 ± 7.4      | 71.1 ± 8.4       | 0.95             |
| Heart rate, bpm                     |                |                 |                  |                  |
| Men                                 | 65.3 ± 9.5     | 66.2 ± 10.2     | 67.9 ± 8.5       | 0.41             |
| Women                               | 67.8 ± 7.9     | 67.6 ± 8.1      | 66.5 ± 8.9       | 0.74             |
| Heart rate variability, log ms      |                |                 |                  |                  |
| Men                                 | 3.00 ± 0.49    | 3.11 ± 0.44     | 2.96 ± 0.38      | 0.32             |
| Women                               | 3.14 ± 0.54    | 3.11 ± 0.54     | 3.09 ± 0.47      | 0.90             |
| Cortisol, log nmol/l                |                |                 |                  |                  |
| Men                                 | 1.97 ± 0.48    | 1.84 ± 0.38     | 1.98 ± 0.51      | 0.25             |
| Women                               | 1.84 ± 0.42    | 1.91 ± 0.38     | 1.88 ± 0.38      | 0.64             |
| C-reactive protein, mg/L            |                |                 |                  |                  |
| Men                                 | 1.96 ± 2.67    | 1.64 ± 1.55     | 1.80 ± 2.85      | 0.74             |
| Women                               | 1.79 ± 2.33    | 1.61 ± 1.89     | 1.99 ± 1.95      | 0.63             |
| IL-6, pg/mL                         |                |                 |                  |                  |
| Men                                 | 1.51 ± 0.91    | 1.37 ± 0.78     | 1.34 ± 0.73      | 0.50             |
| Women                               | 1.34 ± 0.84    | 1.31 ± 0.89     | 1.32 ± 0.71      | 0.98             |
| MCP-1, log pg/mL                    |                |                 |                  |                  |
| Men                                 | 4.90 ± 0.33    | 4.93 ± 0.37     | 4.90 ± 0.40      | 0.96             |
| Women                               | 4.97 ± 0.24    | 4.84 ± 0.36     | 4.90 ± 0.20      | 0.52             |
| TL (T/S ratio)                      |                |                 |                  |                  |
| Men                                 | 1.05 ± 0.046   | 0.94 ± 0.040    | 0.92 ± 0.050     | 0.001            |
| Women                               | 1.05 ± 0.038   | 0.94 ± 0.044    | 0.94 ± 0.047     | 0.011            |
| TA (per 1,000 live cells)           |                |                 |                  |                  |
| Men                                 | 9.41 ± 7.17    | 4.85 ± 1.79     | 14.21 ± 5.72     | 0.001            |
| Women                               | 12.19 ± 6.91   | 5.41 ± 1.67     | 15.45 ± 7.93     | 0.001            |

bpm, beats per minute; TA, telomere activity; TL, telomere length; T/S ratio, telomere/beta-globin gene ratio.

**Table S2. Stress responsivity, stress recovery, and psychosocial resources in women with the three telomere phenotypes**

| Physiological/psychosocial variable | Long telomeres | Short TL/low TA | Short TL/high TA | <i>P</i> , trend |
|-------------------------------------|----------------|-----------------|------------------|------------------|
| Systolic BP,* mmHg                  |                |                 |                  |                  |
| 45-min recovery effect              | -17.8 ± 14.9   | -24.3 ± 14.3    | 19.7 ± 16.8      | 0.49             |
| 75-min recovery effect              | -17.6 ± 16.3   | -20.2 ± 13.1    | -18.4 ± 1.31     | 0.78             |
| Diastolic BP,* mmHg                 |                |                 |                  |                  |
| Stress reactivity                   | 13.5 ± 6.8     | 17.0 ± 5.9      | 14.4 ± 7.4       | 0.53             |
| Heart rate,* bpm                    |                |                 |                  |                  |
| Stress reactivity                   | 8.6 ± 6.4      | 11.6 ± 9.5      | 8.8 ± 6.1        | 0.87             |
| Heart rate variability,* log ms     |                |                 |                  |                  |
| 45-min recovery effect              | 0.39 ± 0.42    | 0.51 ± 0.41     | 0.38 ± 0.38      | 0.93             |
| 75-min recovery effect              | 0.41 ± 0.40    | 0.50 ± 0.41     | 0.30 ± 0.36      | 0.22             |
| Cortisol,* log nmol/L               |                |                 |                  |                  |
| Stress reactivity                   | 0.28 ± 2.01    | 0.71 ± 2.71     | 0.53 ± 2.53      | 0.57             |
| MCP-1,* log pg/mL                   |                |                 |                  |                  |
| 45-min recovery effect              | -0.021 ± 0.22  | -0.015 ± 0.25   | -0.038 ± 0.23    | 0.71             |
| Social support <sup>†</sup>         | 26.42 ± 5.0    | 27.55 ± 4.8     | 26.98 ± 4.3      | 0.54             |
| Optimism <sup>†</sup>               | 15.87 ± 4.3    | 15.64 ± 2.8     | 15.52 ± 4.0      | 0.63             |
| Hostility <sup>†</sup>              | 2.13 ± 2.1     | 2.30 ± 2.1      | 2.24 ± 1.9       | 0.77             |
| Depressive symptoms <sup>†</sup>    | 7.09 ± 6.8     | 7.15 ± 6.7      | 6.80 ± 7.0       | 0.82             |

\*Adjusted for age, grade of employment, BMI, and smoking status.

<sup>†</sup>Adjusted for age and grade of employment.
